# 1 **Linear plasmids in *Klebsiella* and other Enterobacteriaceae**

2  
3 Jane Hawkey<sup>1</sup>, Hugh Cottingham<sup>1</sup>, Alex Tokolyi<sup>2</sup>, Ryan R. Wick<sup>1</sup>, Louise M. Judd<sup>1</sup>, Louise  
4 Cerdeira<sup>3</sup>, Doroti de Oliveira Garcia<sup>4</sup>, Kelly L. Wyres<sup>1</sup>, Kathryn E. Holt<sup>1,5</sup>

5  
6 1 Department of Infectious Diseases, Central Clinical School, Monash University,  
7 Melbourne, Victoria 3004, Australia

8 2 Department of Human Genetics, Wellcome Sanger Institute, Hinxton, UK

9 3 Liverpool School of Tropical Medicine, Liverpool L3 5QA, UK

10 4 Adolfo Lutz Institute, Regional Laboratory Center, Marilia, Brazil

11 5 London School of Hygiene & Tropical Medicine, London WC1E 7HT, UK

## 12 **Corresponding authors**

13 [jane.hawkey@monash.edu](mailto:jane.hawkey@monash.edu)

14 [kat.holt@lshtm.ac.uk](mailto:kat.holt@lshtm.ac.uk)

## 15 **Keywords**

16  
17 linear plasmids, *Klebsiella*, Enterobacteriaceae, toxin-antitoxin

## 18 **Abstract**

19  
20  
21 Linear plasmids are extrachromosomal DNA that have been found in a small number of  
22 bacterial species. To date, the only linear plasmids described in the Enterobacteriaceae  
23 family belong to *Salmonella*, first found in *Salmonella* Typhi. Here, we describe a collection  
24 of 12 isolates of the *Klebsiella pneumoniae* species complex in which we identified linear  
25 plasmids. We used this collection to search public sequence databases and discovered an  
26 additional 74 linear plasmid sequences in a variety of Enterobacteriaceae species. Gene  
27 content analysis divided these plasmids into five distinct phylogroups, with very few genes  
28 shared across more than two phylogroups. The majority of linear plasmid-encoded genes  
29 are of unknown function, however each phylogroup carried its own unique toxin-antitoxin  
30 system and genes with homology to those encoding the ParAB plasmid stability system.  
31 Passage *in vitro* of the 12 linear plasmid-carrying *Klebsiella* isolates in our collection (which  
32 include representatives of all five phylogroups) indicated that these linear plasmids can be  
33 stably maintained, and our data suggest they can transmit between *K. pneumoniae* strains  
34 (including members of globally disseminated multidrug resistant clones) and also between  
35 diverse Enterobacteriaceae species. The linear plasmid sequences, and representative  
36 isolates harbouring them, are made available as a resource to facilitate future studies on the  
37 evolution and function of these novel plasmids.

38  
39

## 40 **Significance as a BioResource to the community**

41 This study provides the first report of linear plasmids identified within the *Klebsiella*  
42 *pneumoniae* species complex and the first report in Enterobacteriaceae besides *Salmonella*.  
43 We present the first comparative analysis of linear plasmid sequences in  
44 Enterobacteriaceae, however whilst this family is highly clinically significant, the functional  
45 and/or evolutionary importance of these plasmids is not yet clear. To facilitate future studies  
46 to address these questions, we have publicly deposited (i) the collection of linear plasmid  
47 sequence data; (ii) isolates representative of each of the distinct linear plasmid phylogroups.  
48

## 49 **Data Summary**

50 **The authors confirm all supporting data, code and protocols have been provided**  
51 **within the article or through supplementary information.**

- 52 1. Whole genome sequence reads from *Klebsiella pneumoniae* isolates sequenced in  
53 this study have been deposited in NCBI SRA under the accession numbers listed in  
54 **Table S1**.
- 55 2. Representative annotated sequences of one linear plasmid per phylogroup have  
56 been deposited in FigShare, **doi 10.26180/16729126**.
- 57 3. A copy of all linear plasmid sequences that we assembled from publicly available  
58 genome sequence reads are available in FigShare, **doi 10.26180/16531365**. Read  
59 accessions for these are given in **Table S1**.
- 60 4. Eleven representative *K. pneumoniae* isolates harbouring linear plasmids described  
61 in this study have been deposited with the National Collection of Type Cultures  
62 (NCTC) and are available for purchase under the NCTC accession numbers listed in  
63 **Table S1**. *K. pneumoniae* 1194/11 (representative of phylogroup B) has been  
64 deposited in the Microorganisms Collection Center, Adolfo Lutz Institute, São Paulo,  
65 Brazil. To request strain 1194/11 (IAL 3063, SISGEN ABBF09B), contact:  
66 Microorganisms Collection Center  
67 Culture Collection Laboratory  
68 Instituto Adolfo Lutz, Sao Paulo State Department of Health  
69 Address: Av Dr Arnaldo, 351, 10 floor, room 1020  
70 Phone number: +55 11 3068-2884  
71 Zip code 01246-000, São Paulo, Brazil  
72 E-mail: [coleccion@ial.sp.gov.br](mailto:coleccion@ial.sp.gov.br)
- 73 5. Alignments of terminal inverted repeat sequences for each phylogroup can be found  
74 in **Data S1**, available on FigShare, **doi 10.26180/16531371**.

75

## 76 Introduction

77 Plasmids are extrachromosomal DNA that are frequently found in bacterial cells. The vast  
78 majority of plasmid molecules exist in a circular conformation, however linear plasmids have  
79 been found in several bacterial species, with the first description in *Streptomyces* in 1979 [1],  
80 and later in *Borrelia* [2], where they are universally present. A study of clinical *Enterococcus*  
81 *faecium* isolates recently reported the existence of a 143 kbp linear plasmid carrying a N-  
82 acetyl-galactosamine (GalNAc) utilization operon that could be transferred between strains  
83 via conjugation [3]. Linear plasmids appear to be exceedingly rare within  
84 Enterobacteriaceae, with the first, pBSSB1 (27 kbp), described in 2007 from *Salmonella*  
85 Typhi isolated in Indonesia [4]. Prior to this discovery, the only other linear replicons  
86 described within Enterobacteriaceae were those derived from bacteriophage, including  
87 pKO2 in *Klebsiella oxytoca* [5], N15 in *Escherichia coli* [6], and PY54 in *Yersinia*  
88 *enterocolitica* [7]. These bacteriophage-derived linear replicons are distinct from the true  
89 linear plasmids described in *Salmonella*, *Enterococcus*, *Streptomyces* and *Borrelia*, as they  
90 still possess bacteriophage-specific genes including those for the lysis pathways [5].

91  
92 For replicons that are linear, there is a requirement to stabilise the terminal ends to ensure  
93 stability and appropriate replication, which in eukaryotes is achieved through the use of  
94 telomeres. In contrast, bacterial linear plasmids can either (i) create hairpin loops, as in  
95 *Borrelia* [8] and *Enterococcus* [3], or (ii) bind telomere-associated proteins to each end of the  
96 molecule with the assistance of terminal inverted repeats (TIRs), as in *Streptomyces* [9]. The  
97 *Salmonella* linear plasmid pBSSB1 was found to carry 1,230 bp TIRs with covalently bound  
98 proteins on the end, similar to *Streptomyces*, however these had no homology to any  
99 previously identified TIRs [4].

100  
101 The *S. Typhi* linear plasmid pBSSB1 encodes two flagellar genes, an *fljA*-like gene and  
102 *fljB<sup>z66</sup>* [4]. *FljB<sup>z66</sup>* encodes the phase II z66 flagellin antigen, whilst the *fljA*-like gene is  
103 thought to encode the repressor of the chromosomally-encoded phase I flagellin antigen,  
104 allowing for phase II z66 antigen presentation [4]. Few other genes from the 27 kbp plasmid  
105 pBSSB1 have been characterised. Linear plasmids homologous to pBSSB1 have since been  
106 described in other *Salmonella* serovars, at a prevalence of ~0.3%, the majority of which  
107 carried the z66 flagellin genes [10].

108  
109 In this study we report the discovery of multiple diverse linear plasmids in genomes  
110 belonging to the *Klebsiella pneumoniae* species complex (*K. pneumoniae* and six closely  
111 related taxa) within the Enterobacteriaceae. We demonstrate the linearity of these replicons  
112 using long-read and short-read sequencing, show they are reliably maintained within their  
113 natural host isolates during 10 rounds of laboratory passage, and identify homologs in the  
114 genomes of several other Enterobacteriaceae species. Clustering on the basis of gene  
115 content, we identify five major phylogroups of *K. pneumoniae* linear plasmids and describe  
116 their sequence characteristics in terms of size, GC content, TIR sequence and TIR length.

117

118

## 119 **Methods**

### 120 ***Identifying linear plasmids in K. pneumoniae species complex genomes***

121 We screened for linear plasmids in the assembly graphs of 1,119 genomes of the *K.*  
122 *pneumoniae* species complex, including 452 from our own collection of human clinical and  
123 carriage isolates [11–13] and 667 publicly available read sets (see **Table 1**). Paired-end  
124 Illumina reads for each genome were assembled using Unicycler v0.4.7, using default  
125 parameters. The first assembly graph produced by Unicycler (001\_best\_spades\_graph.gfa)  
126 was searched for the signature two-contig structure of a linear plasmid (a connected  
127 component of the graph consisting of one contig connected at both ends to the same end of  
128 another contig, see **Figure 1a**) using a custom Python script (available at doi  
129 10.26180/16531374). We subsequently used these linear plasmid sequences as queries for  
130 a nucleotide BLAST search of the 1,119 genome assemblies, to recover instances where the  
131 linear plasmid sequence was present but had not fully assembled into the characteristic two-  
132 contig graph structure. This resulted in a total of 25 linear plasmid sequences, these have  
133 been deposited in FigShare, doi 10.26180/16531365.

134

### 135 ***Identifying homologs in other species***

136 To detect homologous linear plasmids in other bacterial species, we performed a nucleotide  
137 BLAST search of NCBI (May 10th, 2021), using as queries each of the linear plasmid  
138 sequences identified in *Klebsiella*, as well as the pBSSB1 sequence (accession  
139 NC\_011422). Hits with  $\geq 90\%$  identity and  $\geq 60\%$  coverage of a query sequence were  
140 considered as putative linear plasmid sequences (n=61). Metadata for each linear plasmid  
141 sequence and its host bacterium was pulled from the GenBank record for the corresponding  
142 whole genome sequence (WGS). To confirm the taxonomy and multi-locus sequence types  
143 (MLST) of the bacterial hosts of these putative linear plasmids, the chromosome sequence  
144 for each genome was uploaded to Pathogenwatch (<https://pathogen.watch>). For strain WP3-  
145 W18-ESBL-02 (in which plasmid 3, accession AP021975.1, was a hit to linear plasmid query  
146 pINF007 plasmid 3), Pathogenwatch was unable to detect a species, however the Genome-  
147 based Taxonomy Database (using GTDB-Tk [14] with database release 202,  
148 <https://gtdb.ecogenomic.org>) assigned it as a novel *Kluyvera* species, *Kluyvera ascorbata\_B*.  
149 **Table S1** lists the species given by the submitter in GenBank, in addition to species detected  
150 by Pathogenwatch or GTDB, for all genomes.

151

### 152 ***Plasmid stability analysis***

153 For the 12 bacterial isolates in our collection with linear plasmids, we tested the stability of  
154 these plasmids during 10 passages in broth culture. Isolates from frozen glycerol stocks  
155 were streaked onto cation adjusted Mueller Hinton (CAMH) agar plates and incubated for 20  
156 hours at 37°C. A single colony from each plate was streaked onto a fresh CAMH plate and  
157 inoculated into 3 mL of CAMH broth, and both were incubated for 20 hours at 37°C. From  
158 the broth culture, a glycerol stock and bacterial pellet, day 1 (D1) samples were prepared.  
159 This process was repeated 9 additional times to yield day 2-10 (D2-D10) samples.

160

161 Long-read sequencing (Oxford Nanopore Technologies, ONT) was performed as previously  
162 described [15]. Briefly, genomic DNA was prepared from the D1 and D10 bacterial pellets  
163 using GenFind v3 reagents (Beckman Coulter). A long-read sequencing library was  
164 prepared using the ligation library kit (LSK-109, ONT) with native barcoding expansion pack  
165 (EXP-NBD104 and NBD114, ONT). The library was run on a R9.4.1 MinION flow cell for 48

166 hours yielding 2.75 Gbp of reads. Reads were base called with Guppy v3.3.3 using the  
167 dna\_r9.4.1\_450bps\_hac (high-accuracy) basecalling model.

168

169 To determine presence/absence and copy number of all plasmids in each genome, reads  
170 were mapped to their respective reference genome assemblies (listed in **Table S1**) using  
171 minimap2 v2.17 [16]. Mean read depth across each replicon in the assembly was calculated  
172 using the read alignments, and copy number for each plasmid was determined by dividing  
173 mean read depth across a plasmid replicon by the mean read depth across the  
174 chromosome.

175

### 176 ***Confirming plasmid linearity***

177 For the 12 linear-plasmid-positive isolates in our collection, reads from the day 1 (D1) ONT  
178 sequencing (see above) were aligned to their respective reference genomes using minimap2  
179 v2.17 [16]. For each linear and circular plasmid sequence, we extracted all high quality read  
180 alignments (read identity  $\geq 80\%$ , alignment length  $\geq 1,000$  bp) that aligned within 90 bp of the  
181 end of the plasmid reference sequence. For these reads, we calculated the proportion that  
182 extended  $\geq 100$  bp beyond the edge of the plasmid reference sequence (and thus were soft-  
183 clipped  $\geq 100$  bp by the read aligner). If the replicon from which the reads originated was  
184 linear, we would expect to see few or no such soft-clipped reads, because the N'- and C'-  
185 terminal ends of the plasmid ssDNA molecules should match the start and end of the  
186 reference sequence (see **Figure 1b**). However, if the plasmid from which the reads  
187 originated was circular, we would expect to see many reads that are soft-clipped at the ends  
188 of the linearised reference sequence (see **Figure 1c**).

189

### 190 ***Linear plasmid characteristics and relationships***

191 To compare gene content across plasmid sequences, all 86 linear plasmid sequences  
192 retrieved from Enterobacteriaceae genomes were annotated using Prokka v13.3 [17], and  
193 genes were clustered into homologous groups using panaroo v1.2.4 [18], with a threshold of  
194 70% amino acid identity to determine homology (details of clusters can be found in **Table**  
195 **S2**). The panaroo gene presence/absence matrix (**Table S3**) was subjected to hierarchical  
196 clustering using *hclust* in R (with default settings, i.e. Euclidean distance and *ward.D2*  
197 clustering algorithm) to generate a dendrogram, which was cut into five phylogroups after  
198 visual inspection.

199

200 TIR length was calculated by taking each linear plasmid sequence, obtaining the reverse  
201 complement, and determining the length of sequence from the start of the forward and  
202 reverse complement sequences that were identical, with zero mismatches. Nearly all (except  
203 five) linear plasmid assemblies identified via nucleotide BLAST search of NCBI had very  
204 small TIRs using this method ( $n=56$ , between 0-54 bp). We assume this is the result of  
205 artefacts in the assembly process, which we are unable to explore without the underlying  
206 sequence reads; therefore plasmid sequences available only as publicly deposited  
207 assemblies without short reads were excluded from TIR length analyses. TIR sequences for  
208 the 25 linear plasmids generated from our assemblies were extracted, categorised into their  
209 respective phylogroups, and aligned using the clustalo algorithm in SeaView [19] to identify  
210 regions of homology within phylogroups (**Data S1**).

211

212 Nucleotide divergence between linear plasmid sequences was calculated by performing  
213 pairwise BLASTn alignments between all pairs of plasmids in the same phylogroup, and  
214 extracting the percent identity of the longest hit.

215

### 216 **Detailed annotation of representative linear plasmids**

217 To further explore gene function in these linear plasmids, we undertook detailed annotation  
218 for one representative per phylogroup (A, INF019; B, 1194/11; C, INF102; D, INF007; E,  
219 INF352). Each representative was annotated using the RASTtk pipeline [20–22]. We  
220 screened for PFAM domains for all genes identified by RAST with hmmscan [23] via the  
221 EMBL-EBI server using default parameters. Resulting Pfam domains for genes with hits are  
222 listed in **Table S4**. To determine if any genes in the representative plasmids had homology  
223 to genes found in the Enterobacteriaceae, protein sequences were extracted from the RAST  
224 annotations and screened using BLASTp to the refseq\_select database on NCBI, restricting  
225 results to Enterobacteriaceae. Genes with at least 50% protein identity to those in the  
226 Enterobacteriaceae were considered sufficiently similar to have a similar function.  
227 Representative plasmid annotations have been deposited in GenBank, accessions can be  
228 found in **Table S1**. To determine conservation of genes amongst plasmids in the same  
229 phylogroup, RAST annotations were matched with the Prokka annotations from the panaroo  
230 analysis.

231

### 232 **Trinucleotide profiles of linear plasmids and bacterial chromosomes**

233 To investigate the potential donors of the linear plasmids into Enterobacteriaceae, we used  
234 *compseq* from the EMBOSS package [24] to calculate the frequencies of all possible  
235 trinucleotides in each of our 12 *Klebsiella* linear plasmids, their host chromosomes, as well  
236 as one representative per bacterial species (n=47,893) as defined by the GTDB database  
237 release 202 [25, 26]. We created a distance matrix using these frequencies with the *rdist*  
238 function in the R package *fields* (<https://github.com/NCAR/Fields>).

239

## 240 **Results and Discussion**

### 241 **Identification of linear plasmids**

242 We identified unusual structures in the assembly graphs of some *K. pneumoniae* in our in-  
243 house collection of genomes, which were consistent with linear plasmids with inverted  
244 repeats at either end (**Figure 1a, Methods**). We systematically screened for these structures  
245 in the assembly graphs of our in-house collection of *K. pneumoniae* species complex  
246 isolates, collected from human clinical infections or colonisation [11, 12] in an Australian  
247 hospital (n=452), as described in **Methods**. This screen yielded 11 genomes harbouring  
248 linear plasmids (2.4% of genomes) including seven *K. pneumoniae* and four *Klebsiella*  
249 *variicola* (**Table S1**). The corresponding isolates originated from nine patients, representing  
250 three instances of asymptomatic colonisation (*K. pneumoniae* ST359, *K. variicola* ST386  
251 and ST642), one instance of simultaneous gut colonisation and pneumonia (*K. pneumoniae*  
252 ST37), and five instances of clinical infection (urinary tract infection with *K. pneumoniae*  
253 ST20, ST27, ST1449; wound infection with *K. pneumoniae* ST3073 and *K. variicola* ST347).  
254 The only extended-spectrum beta lactamase (ESBL)-positive (which confers resistance to  
255 the third generation cephalosporins) isolates amongst those with identified linear plasmids  
256 were two *K. variicola* ST347 isolated from the same patient nine days apart.

257

258 The linear plasmids were median 33,775 bp in size (range 31,739 - 44,271 bp), including the  
259 TIRs at either end. To confirm our hypothesis that these plasmids were indeed linear  
260 molecules, rather than the typical circular plasmid structure, we undertook additional  
261 sequencing using long reads, and aligned the long reads to each linear plasmid (see  
262 **Methods**). Plasmids were considered linear if there were few soft-clipped bases from reads  
263 aligned at the start or end of the linear reference sequence (unlike a circular replicon, where  
264 many reads are expected to overlap the ends of the linearised reference sequence, see  
265 **Figure 1b**). The 12 linear plasmids had a median of 3.5% (range 0.6-32.4%) soft-clipped  
266 start or end reads, compared to 98.5% (range 92.3-100%) for the circular plasmids (**Figure**  
267 **1b, Fig S1, Table S1**). Additionally, all but two linear plasmids (those from *K. variicola*  
268 ST347) were supported by reads (median n=70, range n=10 to 177) that spanned the full  
269 length of the plasmid, including both TIRs (**Table S1**). Importantly, the soft-clipped parts of  
270 the reads did not map to the other end of the plasmid sequence (as would be expected for a  
271 circular plasmid), rather, they were chimeric reads, where two unrelated DNA segments  
272 have fused during library preparation [27].

273

274 To investigate whether other linear plasmids are present in the *K. pneumoniae* species  
275 complex, we generated and screened assembly graphs for an additional 667 publicly  
276 available read sets, which represent a diverse set of (mostly human clinical) isolates from  
277 multiple continents including Africa, Asia and Europe (**Table 1**). Across this set of genomes,  
278 we identified linear plasmid graph structures in an additional 14 genomes (2.1%, see **Table**  
279 **1**). The corresponding isolates include 12 *K. pneumoniae* from humans (UK, Kenya,  
280 Cambodia, Brazil), one *K. pneumoniae* isolated from retail pork (USA), and one *Klebsiella*  
281 *africana* human blood isolate (Kenya).

282

283 Using as queries the sequences of the 25 linear plasmids that we identified from *Klebsiella*  
284 assembly graphs, we performed a BLAST search of the NCBI database to identify homologs  
285 in other genomes (see **Methods**). This revealed another 61 putative linear plasmid  
286 sequences; all were from Enterobacteriaceae, including *Klebsiella* (n=23, including 17 *K.*  
287 *pneumoniae*), *Salmonella enterica* (n=16, including pBSSB1), *Citrobacter* (n=8),  
288 *Enterobacter* (n=7), *Escherichia coli* (n=3), *Serratia marcescens* (n=2), *Phytobacter*  
289 *diazotrophicus* (n=1) and *Kluyvera ascorbata\_B* (n=1) (**Table S1**). Genomes harbouring  
290 linear plasmids came from a wide variety of sources, including bacteria isolated from water  
291 (n=19), humans (n=13), food (n=4), animals (n=3), and plants (n=1) (**Table S1**). Amongst  
292 the linear-plasmid-positive *K. pneumoniae* were well-known carbapenemase-producing and  
293 ESBL producing clones: ST340 (n=3, KPC-4 and CTX-M-15), ST258 (KPC-2 and SHV-12),  
294 ST11 (n=1, KPC-2 and SHV-12), ST147 (n=1, OXA-181 and CTX-M-15). Hundreds of  
295 genomes of each of these clones are present in the NCBI database and the vast majority do  
296 not harbour linear plasmid sequences, suggesting that the linear-plasmid-positive variants  
297 are rare, and likely result from recent horizontal transfer but this has not resulted in clonal  
298 expansion during which the plasmid has been stably maintained. This is in contrast to the  
299 recent report in *E. faecium* where the linear plasmid *pELF\_USZ* was stably maintained in a  
300 host lineage during >2 years of clonal spread in a hospital [3].

301

### 302 **Characteristics of linear plasmids in Enterobacteriaceae**

303 We compiled the full set of 86 linear plasmid sequences (25 identified from assembly  
304 graphs, plus 61 inferred from homology via BLAST) and clustered them by their gene  
305 content (see Methods). This revealed five distinct linear plasmid phylogroups (which we

306 labelled A-E, see **Figure 2, Table S2 & S3**), with very little gene sharing between  
307 phylogroups (genes defined as homologous if they had >70% nucleotide identity). Each  
308 phylogroup included sequences from multiple genera, notably all five phylogroups were  
309 detected in both *Klebsiella* and *Salmonella* (**Figure 2**). No genes were present across more  
310 than two phylogroups, but each phylogroup had a core set of genes found in  $\geq 95\%$  of  
311 plasmids in that group; these represented between 15% (phylogroup E) to 47% (phylogroup  
312 B) of all genes found in that phylogroup (**Figure 3a, Figure 4a**). Nucleotide diversity within  
313 phylogroups varied (**Figure 3b**), with phylogroup A displaying significantly greater pairwise  
314 divergence across the full plasmid sequence than phylogroups B, C and D (mean 6%  
315 divergence vs mean 2.6-4.2%,  $p < 1 \times 10^{-16}$  using Wilcoxon test for A vs B, C or D).  
316 Phylogroup E showed a high range in divergence (0-16%, mean 4.2%), due to the presence  
317 of two divergent subgroups (see **Figure 2**).

318  
319 The vast majority of genes annotated in each linear plasmid were hypothetical proteins and  
320 had no close homologs in other Enterobacteriaceae genomes (**Figure 4b**). However, there  
321 were few reference plasmid genes ( $n=55$ , 20%) for which we were able to obtain some form  
322 of functional annotation based on sequence homology or protein domain matches (see  
323 **Methods, Table S4**). Most of these annotations were for genes encoding proteins likely  
324 relevant to basic plasmid maintenance functions. All five phylogroups carried genes with  
325 type II toxin-antitoxin domains (see **Table S4**), which are often found on plasmids and can  
326 enable plasmid maintenance by performing post segregational killing of daughter cells that  
327 do not carry the plasmid [28]. These systems were core in all phylogroups. Phylogroups A,  
328 B, C and D each carried a *relBE* family system (65%-83% homology between variants in  
329 phylogroups B-D, A carried a distinct variant), whilst phylogroup E carried a *vapBC* system  
330 (**Figure 4b**). These toxin-antitoxin clusters generally had at least one gene of the pair  
331 encoding a protein with  $\geq 50\%$  homology to toxin-antitoxin systems found in  
332 Enterobacteriaceae (**Figure 4b, Table S4**). Pairs of adjacent genes encoding novel proteins  
333 with Pfam matches to the partitioning proteins ParA (PF13614 or PF01656) and ParB  
334 (PF18821) were detected as core in each phylogroup (**Figure 4, Table S4**). These likely  
335 contribute to control of plasmid segregation into daughter cells [29], homologous sequences  
336 were not detected in other Enterobacteriaceae. Sequences with homology to the  
337 transcriptional repressor *hns* were identified in all phylogroups except A (**Figure 4b**),  
338 however the encoded proteins were highly divergent from one another (27-66%) and the  
339 genes were classed as separate gene groups by panaroo (**Table S2**). *Hns* are commonly  
340 plasmid-encoded and regulate expression of both plasmid and chromosomally-encoded  
341 genes. Proteins with hits to known restriction/modification domains were also identified in all  
342 reference plasmids, these are frequently encoded by mobile elements and can function as  
343 toxin/antitoxin systems to force maintenance of those elements. Phylogroup A was the only  
344 phylogroup in which flagellin genes were identified, in  $n=7/16$  plasmid sequences. One of  
345 these was plasmid pBSSB1, and the other six were all linear plasmids from *Salmonella*  
346 *enterica* serovar Senftenberg isolated from Switzerland [10]. Phylogroups C and D both  
347 carried three core genes apiece harbouring PilS (type IV pilin) domains (**Figure 4b**), which  
348 could potentially function as adhesins.

349  
350 All five phylogroups differed substantially from one another in their basic characteristics,  
351 including plasmid length, TIR length and GC content. Phylogroups D and C had the longest  
352 plasmids (medians 40.9 kbp and 42.9 kbp respectively), and phylogroup B the smallest  
353 (median 23.7 kbp, **Figure 5a**). We calculated the size of TIRs by aligning the beginning of



354 each plasmid to the reverse complement of itself (see **Methods**). We were able to detect a  
355 TIR in 57 of the linear plasmid sequences. Those without a TIR were all identified in publicly  
356 available assemblies that were assembled using a variety of methods, and we hypothesise  
357 that the lack of TIR sequence is most likely due to incomplete or fragmented assembly of the  
358 plasmid, rather than lack of TIR in the sequenced molecules. For plasmids where we  
359 performed the assembly in-house, we found that the length of the TIR differed substantially  
360 between phylogroups, with phylogroups A and D having the longest TIRs (medians 1168 bp  
361 and 1074 bp respectively), whilst phylogroups B, C and E had TIRs of approximately half  
362 that length (medians 542 bp, 530 bp and 670 bp respectively, **Figure 5b**). There was a high  
363 level of sequence conservation for TIRs within phylogroups, with a median of 89-97%  
364 similarity in this region in phylogroups A - D (**Data S1, Figure S2**). Phylogroup E was more  
365 diverse with an overall similarity of 65%; however, inspection of the alignments revealed that  
366 this phylogroup carried two distinct TIR sequences, with a median of 89-99% TIR sequence  
367 identity within each TIR grouping (**Data S1, Figure S2**). Finally, %GC for the linear plasmids  
368 was very low in comparison to the normal chromosomal %GC range for Enterobacteriaceae,  
369 which is typically ~50% (median 57% for the *Klebsiella* carrying linear plasmids). All linear  
370 plasmid phylogroups had %GC <40%, with phylogroup B having the lowest out of all the  
371 phylogroups (median 28%, compared to 34-35% for other phylogroups,  $p < 2.5 \times 10^{-4}$  for all  
372 comparisons, Wilcoxon test, **Figure 5c**).

373

#### 374 **Potential donors of linear plasmids and their stability in *Klebsiella***

375 Given that linear plasmids are rare in *Klebsiella* and have a significantly lower %GC than  
376 their host chromosomes, we assume that Enterobacteriaceae are unlikely to be the typical  
377 hosts for these plasmids. We used trinucleotide frequencies as a genomic signature to  
378 attempt to identify potential original hosts of these plasmids by calculating the distance  
379 between our linear plasmids, their *Klebsiella* host chromosomes, and one representative per  
380 bacterial species defined in the GTDB (see **Methods**). The 12 *Klebsiella* linear plasmids  
381 clustered separately from their corresponding host chromosomes, with a mean distance of  
382 2.3 between the chromosomes and linear plasmids (**Fig S3**). The *Klebsiella* chromosomes  
383 were much more similar to each other than the linear plasmids (mean pairwise distance of  
384 0.07 between chromosomal sequences vs 1.27 between pairs of linear plasmid sequences),  
385 and clustered closely with other representatives of *Klebsiella* in the GTDB database (nearest  
386 neighbour accession GCF\_000742135.1, distance 0.09). The linear plasmid from 1194/11  
387 clustered most closely to the Firmicute DUOC01 sp012839065 (accession  
388 GCA\_012839065.1, distance 1.3). This organism belongs to a strain from the class  
389 Thermosediminibacteria, which was detected in a metagenomic sample obtained from an  
390 anaerobic digester [30]. The other 11 linear plasmids were their own nearest neighbours  
391 (median pairwise distance 1.09), the closest GTDB profile was Proteobacteria isolate  
392 Neptuniibacter sp002435145 (accession GCA\_002435145.1, mean distance 1.15 to the 11  
393 plasmids). This organism belongs to the order Pseudomonadales, and was detected in a  
394 marine environment [31].

395

396 To understand whether linear plasmids could be stably maintained within *Klebsiella*, we  
397 undertook passage experiments on the 11 *Klebsiella* genomes carrying linear plasmids in  
398 our collection. We performed long-read sequencing on all parental isolates (D1), passaged  
399 each isolate 10 times (one passage per 24 hour period), and then performed long-read  
400 sequencing on the final D10 isolates (see **Methods**). We found that all plasmids, both linear  
401 and circular, were maintained in all genomes across 10 passages (**Figure 6**). Linear plasmid

402 copy number was generally estimated at ~1 per cell at both D1 and D10, with the exception  
403 of 1194/11 (the only representative of phylogroup B), which had a copy number of 2-4, and  
404 two of the phylogroup E plasmids (strains INF345, INF352) with copy number ~2 (see  
405 **Figure 6**).

406

## 407 **Conclusions**

408 Here we provide the first (to our knowledge) collection of linear plasmids in the *K.*  
409 *pneumoniae* species complex alongside a detailed description of their characteristics. Our  
410 data show these plasmids are uncommon in *Klebsiella* and other *Enterobacteriaceae*  
411 species, but can be stably maintained and can transfer between distinct *K. pneumoniae*  
412 strains (including representatives of the globally-distributed multidrug resistant clones) and  
413 other diverse *Enterobacteriaceae* [4]. The novel *Klebsiella* linear plasmids described here do  
414 not carry any known antimicrobial resistance, virulence or metabolic genes; however  
415 carriage of a linear plasmid has previously been shown to provide a metabolic advantage for  
416 vancomycin-resistant *Enterococcus faecium* in the human gut [3] and to enable flagellar  
417 antigen switching in *Salmonella* Typhi. By making freely available these linear plasmid  
418 sequences and representative isolates that carry them, we hope to facilitate future research  
419 into the function and potential evolutionary or clinical significance of these enigmatic  
420 replicons.

421

## 422 **Authors and contributions**

423 Conceptualization, R.R.W, K.L.W and K.E.H; Formal analysis, J.H, H.C, A.T, R.R.W, L.M.J,  
424 K.E.H; Methodology, R.R.W, A.T, L.M.J, K.L.W and K.E.H; Software, A.T and R.R.W;  
425 Resources, L.C and D.O.G; Visualization, J.H, H.C, R.R.W and K.E.H; Writing - Original  
426 Draft, J.H, H.C and K.E.H; Writing - Review & Editing, all authors; Funding acquisition,  
427 K.E.H; Project administration, K.E.H.

428

## 429 **Conflicts of interest**

430 The authors declare that there are no conflicts of interest.

431

## 432 **Funding information**

433 K.E.H. was supported by a Senior Medical Research Fellowship from the Viertel Foundation  
434 of Australia. This work was supported in part by the Bill & Melinda Gates Foundation  
435 OPP1175797. Under the grant conditions of the Foundation, a Creative Commons  
436 Attribution 4.0 Generic License has already been assigned to the Author Accepted  
437 Manuscript version that might arise from this submission.

438

439

## 440 References

- 441 1. **Hayakawa T, Tanaka T, Sakaguchi K, Otake N, Yonehara H.** A linear plasmid-like DNA  
442 in *Streptomyces* sp. producing lankacidin group antibiotics. *J Gen Appl Microbiol*  
443 1979;25:255–260.
- 444 2. **Plasterk RHA, Simon MI, Barbour AG.** Transposition of structural genes to an  
445 expression sequence on a linear plasmid causes antigenic variation in the bacterium *Borrelia*  
446 *hermsii*. *Nature* 1985;318:257–263.
- 447 3. **Boumassoud M, Haunreiter VD, Schweizer TA, Meyer L, Chakrakodi B, et al.**  
448 Genomic surveillance of vancomycin-resistant *Enterococcus faecium* reveals spread of a  
449 linear plasmid conferring a nutrient utilization advantage. *bioRxiv* 2021;2021.05.07.442932.
- 450 4. **Baker S, Hardy J, Sanderson KE, Quail M, Goodhead I, et al.** A Novel Linear Plasmid  
451 Mediates Flagellar Variation in *Salmonella* Typhi. *Plos Pathog* 2007;3:e59.
- 452 5. **Casjens SR, Gilcrease EB, Huang WM, Bunny KL, Pedulla ML, et al.** The pKO2 Linear  
453 Plasmid Prophage of *Klebsiella oxytoca*. *J Bacteriol* 2004;186:1818–1832.
- 454 6. **Ravin V, Ravin N, Casjens S, Ford ME, Hatfull GF, et al.** Genomic sequence and  
455 analysis of the atypical temperate bacteriophage N15. *J Mol Biol* 2000;299:53–73.
- 456 7. **Hertwig S, Klein I, Lurz R, Lanka E, Appel B.** PY54, a linear plasmid prophage of  
457 *Yersinia enterocolitica* with covalently closed ends. *Mol Microbiol* 2003;48:989–1003.
- 458 8. **Lucyshyn D, Huang SH, Kobryn K.** Spring loading a pre-cleavage intermediate for  
459 hairpin telomere formation. *Nucleic Acids Res* 2015;43:6062–6074.
- 460 9. **Yang C-C, Tseng S-M, Chen CW.** Telomere-associated proteins add deoxynucleotides to  
461 terminal proteins during replication of the telomeres of linear chromosomes and plasmids in  
462 *Streptomyces*. *Nucleic Acids Res* 2015;43:6373–6383.
- 463 10. **Robertson J, Lin J, Wren-Hedgus A, Arya G, Carrillo C, et al.** Development of a multi-  
464 locus typing scheme for an Enterobacteriaceae linear plasmid that mediates inter-species  
465 transfer of flagella. *Plos One* 2019;14:e0218638.
- 466 11. **Gorrie CL, Mirceta M, Wick RR, Edwards DJ, Strugnell RA, et al.** Gastrointestinal  
467 carriage is a major reservoir of *K. pneumoniae* infection in intensive care patients. *bioRxiv*  
468 2017;096446–096446.
- 469 12. **Gorrie CL, Mirceta M, Wick RR, Judd LM, Wyres KL, et al.** Antimicrobial-resistant  
470 *Klebsiella pneumoniae* carriage and infection in specialized geriatric care wards linked to  
471 acquisition in the referring hospital. *Clin Infect Dis* 2018;67:161–170.
- 472 13. **Bueno MFC, Francisco GR, O'Hara JA, Garcia D de O, Doi Y.** Coproduction of 16S  
473 rRNA Methyltransferase RmtD or RmtG with KPC-2 and CTX-M Group Extended-Spectrum  
474  $\beta$ -Lactamases in *Klebsiella pneumoniae*. *Antimicrob Agents Ch* 2013;57:2397–2400.
- 475 14. **Chaumeil P-A, Mussig AJ, Hugenholtz P, Parks DH.** GTDB-Tk: a toolkit to classify  
476 genomes with the Genome Taxonomy Database. *Bioinform Oxf Engl*.  
477 2019;10.1093/bioinformatics/btz848.
- 478 15. **Wick RR, Judd LM, Gorrie CL, Holt KE.** Completing bacterial genome assemblies with  
479 multiplex MinION sequencing. *Microb Genom* 2017;3:e000132–e000132.
- 480 16. **Li H.** Minimap2: pairwise alignment for nucleotide sequences. *Bioinformatics*  
481 2018;34:3094–3100.
- 482 17. **Seemann T.** Prokka: rapid prokaryotic genome annotation. *Bioinformatics*  
483 2014;30:2068–2069.
- 484 18. **Tonkin-Hill G, MacAlasdair N, Ruis C, Weimann A, Horesh G, et al.** Producing  
485 polished prokaryotic pangenomes with the Panaroo pipeline. *Genome Biol* 2020;21:180.
- 486 19. **Gouy M, Guindon S, Gascuel O.** SeaView version 4: A multiplatform graphical user

- 487 interface for sequence alignment and phylogenetic tree building. *Mol Biol Evol* 2009;27:221–  
488 4.
- 489 20. **Aziz RK, Bartels D, Best AA, DeJongh M, Disz T**, et al. The RAST Server: Rapid  
490 Annotations using Subsystems Technology. *BMC Genomics* 2008;9:75–75.
- 491 21. **Overbeek R, Olson R, Pusch GD, Olsen GJ, Davis JJ**, et al. The SEED and the Rapid  
492 Annotation of microbial genomes using Subsystems Technology (RAST). *Nucleic Acids Res*  
493 2014;42:D206 14-D206 14.
- 494 22. **Brettin T, Davis JJ, Disz T, Edwards RA, Gerdes S**, et al. RASTtk: A modular and  
495 extensible implementation of the RAST algorithm for building custom annotation pipelines  
496 and annotating batches of genomes. *Sci Rep* 2015;5:8365.
- 497 23. **Finn RD, Clements J, Eddy SR**. HMMER web server: interactive sequence similarity  
498 searching. *Nucleic Acids Res* 2011;39:W29–W37.
- 499 24. **Rice P, Longden I, Bleasby A**. EMBOSS: the European Molecular Biology Open  
500 Software Suite. *Trends Genetics* 2000;16:276–7.
- 501 25. **Parks DH, Chuvochina M, Chaumeil P-A, Rinke C, Mussig AJ**, et al. A complete  
502 domain-to-species taxonomy for Bacteria and Archaea. *Nat Biotechnol* 2020;38:1079–1086.
- 503 26. **Parks DH, Chuvochina M, Waite DW, Rinke C, Skarshewski A**, et al. A standardized  
504 bacterial taxonomy based on genome phylogeny substantially revises the tree of life. *Nat*  
505 *Biotechnol* 2018;36:996–1004.
- 506 27. **Wick RR, Judd LM, Wyres KL, Holt KE**. Recovery of small plasmid sequences via  
507 Oxford Nanopore sequencing. *Microb Genom* 2021;7:10.1099/mgen.0.000631.
- 508 28. **Fraikin N, Goormaghtigh F, Melderer LV**. Type II Toxin-Antitoxin Systems: Evolution  
509 and Revolutions. *J Bacteriol* 2020;202(7): e00763-19.
- 510 29. **Roberts MAJ, Wadhams GH, Hadfield KA, Tickner S, Armitage JP**. ParA-like protein  
511 uses nonspecific chromosomal DNA binding to partition protein complexes. *Proc National*  
512 *Acad Sci* 2012;109:6698–6703.
- 513 30. **Campanaro S, Treu L, Rodriguez-R LM, Kovalovszki A, Ziels RM**, et al. New insights  
514 from the biogas microbiome by comprehensive genome-resolved metagenomics of nearly  
515 1600 species originating from multiple anaerobic digesters. *Biotechnol Biofuels* 2020;13:25.
- 516 31. **Parks DH, Rinke C, Chuvochina M, Chaumeil P-A, Woodcroft BJ**, et al. Recovery of  
517 nearly 8,000 metagenome-assembled genomes substantially expands the tree of life. *Nat*  
518 *Microbiol* 2017;2:1533–1542.
- 519 32. **Cerdeira L, Fernandes MR, Francisco GR, Bueno MFC, lenne S**, et al. Draft Genome  
520 Sequence of a Hospital-Associated Clone of *Klebsiella pneumoniae* ST340/CC258  
521 Coproducing RmtG and KPC-2 Isolated from a Pediatric Patient. *Genome Announc*  
522 2016;4:e01130-16.
- 523 33. **Stoesser N, Batty EM, Eyre DW, Morgan M, Wyllie DH**, et al. Predicting antimicrobial  
524 susceptibilities for *Escherichia coli* and *Klebsiella pneumoniae* isolates using whole genomic  
525 sequence data. *J Antimicrob Chemoth* 2013;68:2234–2244.
- 526 34. **Smit PW, Stoesser N, Pol S, Kleef E van, Oonsivilai M**, et al. Transmission Dynamics  
527 of Hyper-Endemic Multi-Drug Resistant *Klebsiella pneumoniae* in a Southeast Asian  
528 Neonatal Unit: A Longitudinal Study With Whole Genome Sequencing. *Front Microbiol*  
529 2018;9:1197.
- 530 35. **Davis GS, Waits K, Nordstrom L, Weaver B, Aziz M**, et al. Intermingled *Klebsiella*  
531 *pneumoniae* Populations Between Retail Meats and Human Urinary Tract Infections. *Clin*  
532 *Infect Dis* 2015;61:892–899.
- 533 36. **Henson SP, Boinett CJ, Ellington MJ, Kagia N, Mwarumba S**, et al. Molecular  
534 epidemiology of *Klebsiella pneumoniae* invasive infections over a decade at Kilifi County

535 Hospital in Kenya. *Int J Med Microbiol* 2017;307:422–429.  
536 37. **Moradigaravand D, Martin V, Peacock SJ, Parkhill J.** Evolution and Epidemiology of  
537 Multidrug-Resistant *Klebsiella pneumoniae* in the United Kingdom and Ireland. *Mbio*  
538 2017;8:e01976-16.

## 539 **Figures and Tables**

540

541 **Table 1:** Number of genomes positive for a linear plasmid across multiple different studies  
542 from a variety of geographic regions and sampling types.

| <b>Dataset</b>                        | <b># genomes</b> | <b># linear plasmids</b> | <b>Country of origin</b> | <b>Sampling type</b>                              |
|---------------------------------------|------------------|--------------------------|--------------------------|---------------------------------------------------|
| In-house collection (KASPAH) [11, 12] | 452              | 11 (2.4%)                | Australia                | Humans (infections and faecal carriage)           |
| Bueno 2013 [13, 32]                   | 8                | 1 (12.5%)                | Brazil                   | Humans, agricultural animals, urban waterways     |
| Stoesser 2013 [33]                    | 69               | 2 (2.9%)                 | UK                       | Humans (bloodstream infections)                   |
| Smit 2018 [34]                        | 90               | 3 (3.3%)                 | Cambodia                 | Humans (neonatal care unit)                       |
| Davis 2015 [35]                       | 61               | 1 (1.6%)                 | UK                       | Humans (urinary tract infections) and retail meat |
| Henson 2017 [36]                      | 185              | 5 (2.7%)                 | Kenya                    | Humans (bloodstream infections)                   |
| Moradigaravand 2017 [37]              | 250              | 2 (0.8%)                 | UK and Ireland           | Humans (bloodstream infections)                   |

543

544

545

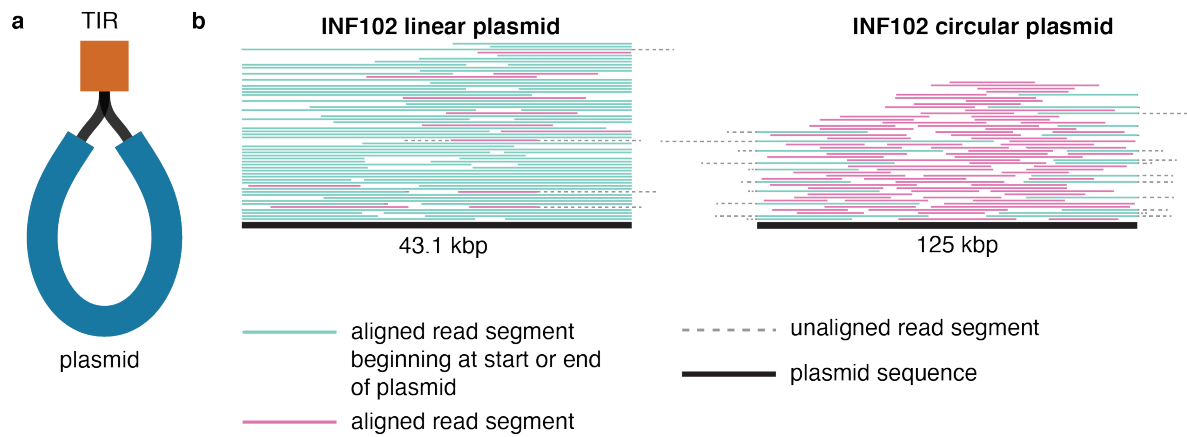

546

547

548

549

550

551

552

553

554

555

556

557

558

559

560

**Figure 1: Using read sequence data to determine linearity of plasmid sequences. a,** Short read assembly graph structure of a linear plasmid. The plasmid consists of two contigs, the main plasmid sequence (blue, labelled 'plasmid'), connected to a second, shorter contig which is the terminal inverted repeat at both ends (orange, labelled 'TIR'). **b,** Long reads aligned to the linear and circular plasmid sequences from INF102, with the total number of alignments shown capped at 100 to improve visualisation. The plasmid sequence is the thick black line at the bottom, and reads aligning to the plasmid are shown in green if the alignment starts at the beginning or end of the plasmid sequence, or pink if the alignment starts elsewhere. Segments coloured dotted grey indicate regions of the read that do not align. Alignments to the linear plasmid have very few reads which soft-clip off the ends of the plasmid sequence, indicating linearity. Conversely, alignments to a circular plasmid have many reads soft-clipping over the edges of the plasmid sequence, indicating that this replicon is circular.

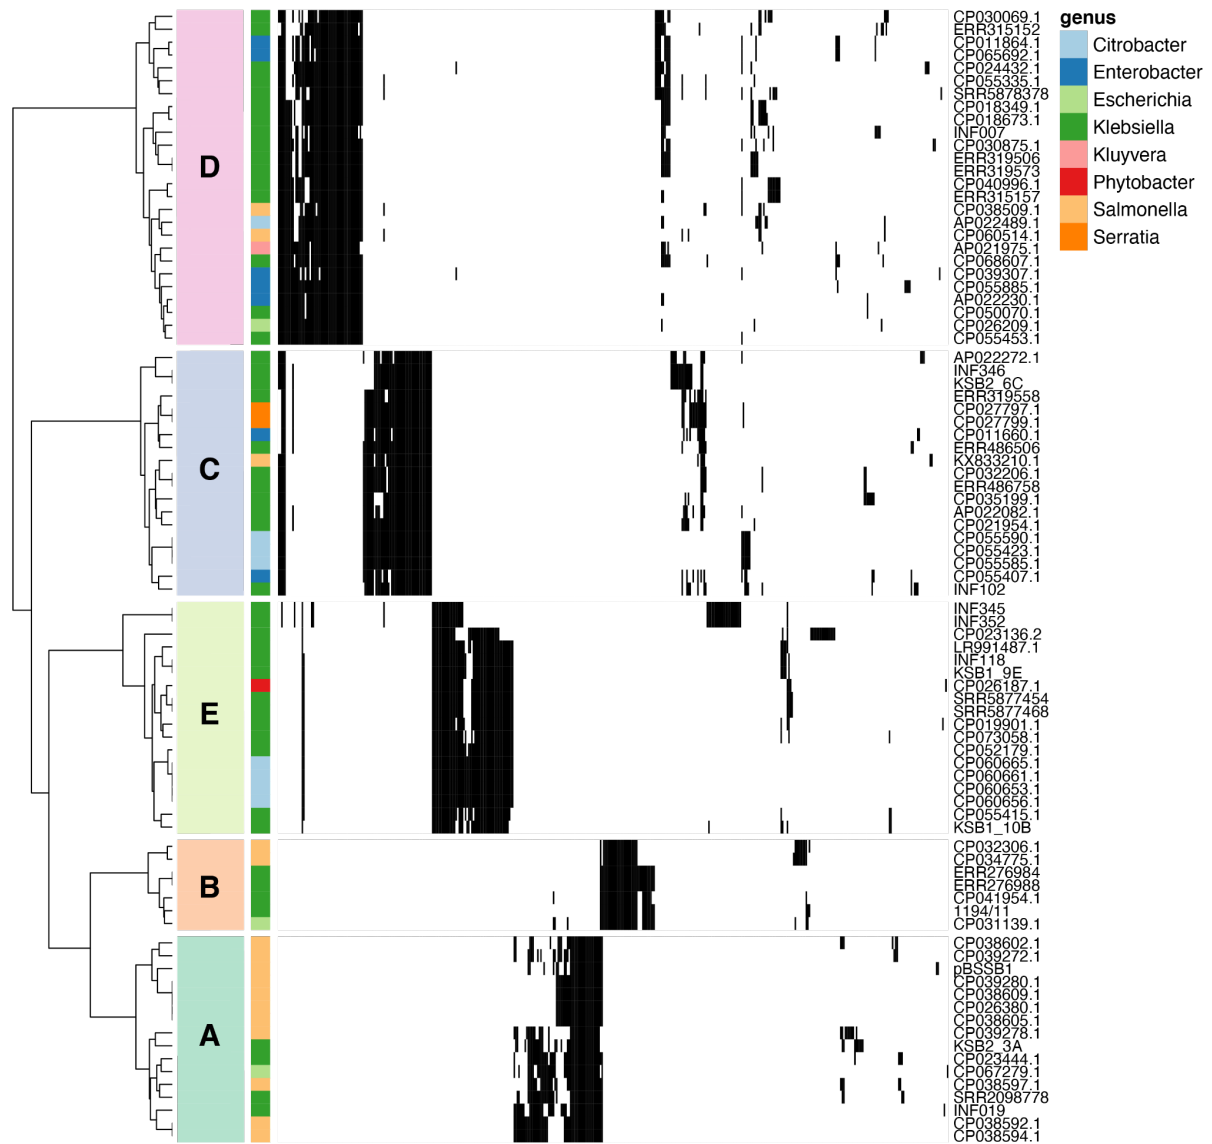

**Figure 2: Hierarchical clustering of linear plasmids based on gene content.** Plasmids were clustered with the *hclust* algorithm using the *ward.D2* method, and divided into five phylogroups (labelled in coloured boxes). Rows are annotated with the bacterial genus each linear plasmid was found in as per legend. Black indicates the presence of a gene, white absence. Plasmids are labelled with their names as per **Table S1**, and details of each gene can be found in **Table S2**.

568

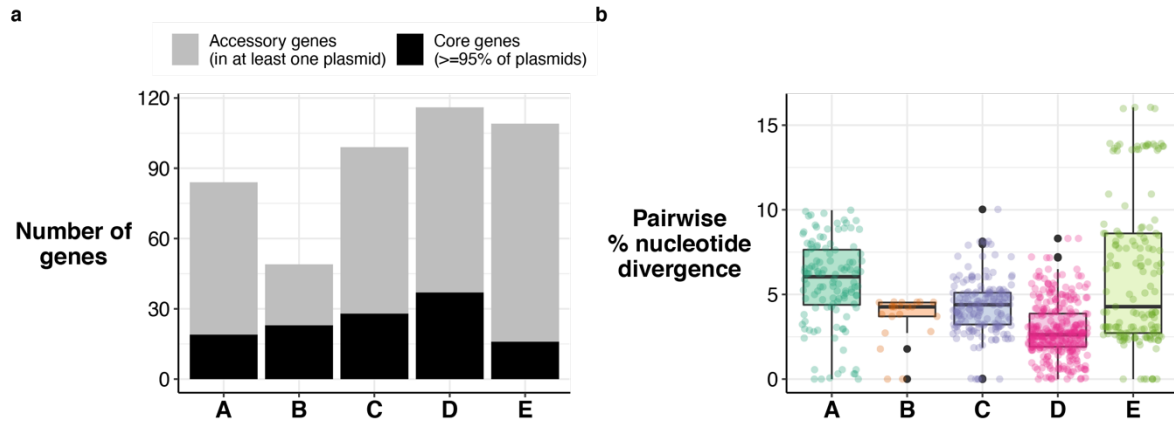

569  
570  
571  
572  
573  
574  
575  
576  
577  
578

**Figure 3: Core and accessory gene content by phylogroup, and nucleotide divergence by phylogroup.** **a**, Number of core and accessory genes in each phylogroup. Bar height indicates the total number of genes found in at least one linear plasmid in each phylogroup. Black indicates the number of core genes (found in  $\geq 95\%$  of plasmids); grey the number of accessory genes, as per legend. **b**, Distribution of pairwise nucleotide divergence within each phylogroup. Boxplots show median (thick black line), 1<sup>st</sup> and 3<sup>rd</sup> quartiles (edges of box), and solid lines give 1.5x the interquartile range. Outliers are shown as black dots. Individual values are shown as coloured dots.



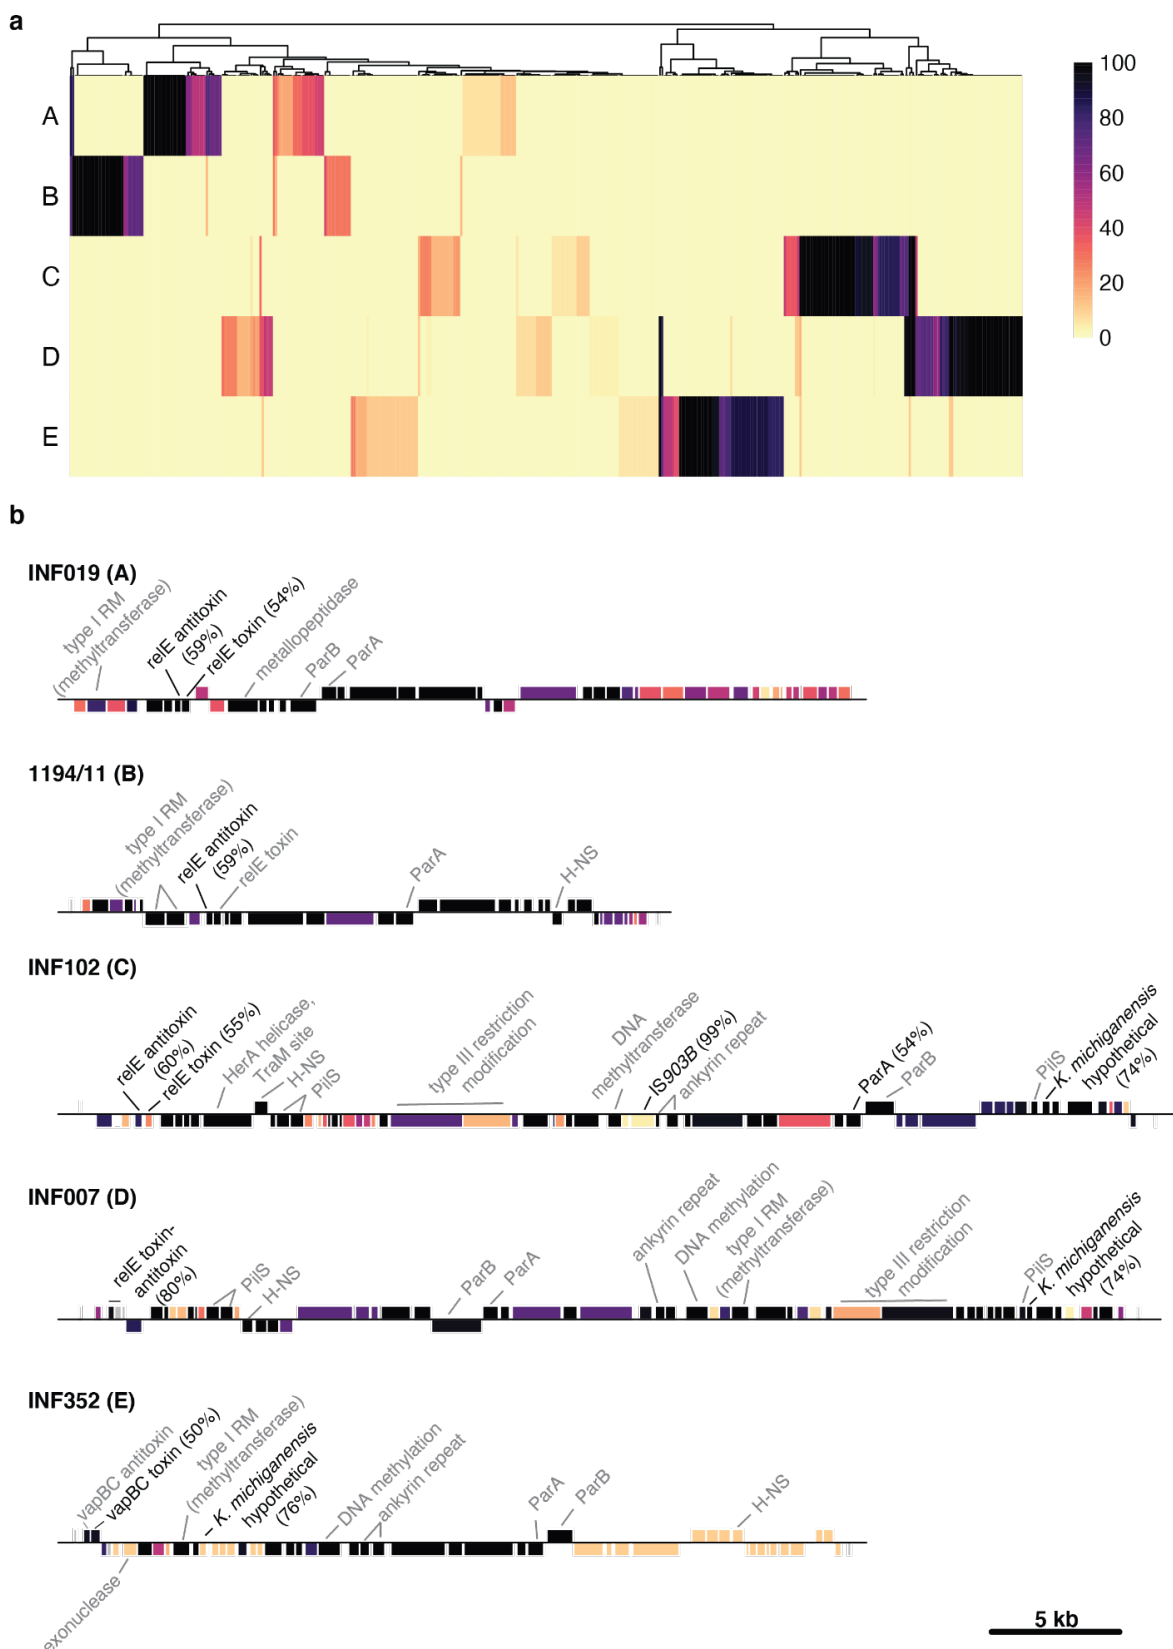

579  
 580 **Figure 4: Conservation and function of genes in each phylogroup.** **a**, Heatmap showing  
 581 proportion of plasmids with each gene by phylogroup. Columns are genes, clustered using  
 582 *hclust*; rows are phylogroups (unclustered). Colour within each cell indicates the proportion  
 583 of plasmids carrying each gene, as per legend. **b**, Gene maps of one representative plasmid

584 per phylogroup. Genes are indicated by blocks (above line - forward orientation, below line -  
585 reverse orientation) and coloured by conservation in their phylogroup. Genes with  $\geq 50\%$   
586 homology to known genes in Enterobacteriaceae are indicated by black lines and text, with  
587 gene homology shown in brackets. Genes with detected PFAM domains are indicated by  
588 grey lines and text. Details of each gene can be found in **Table S4**.  
589

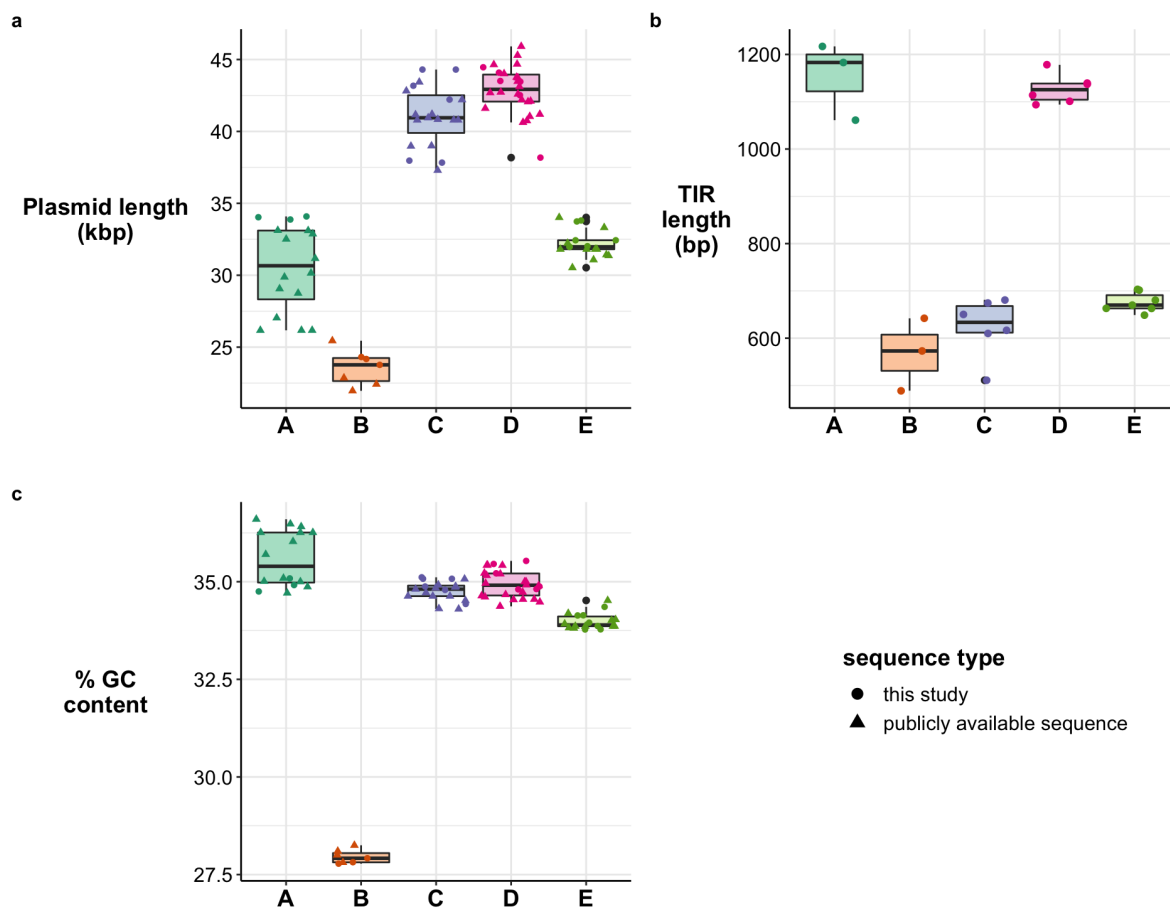

590 **Figure 5: Characteristics of linear plasmid phylogroups. a, Distribution of plasmid**  
591 **lengths in kbp.** Boxplots show median (black line), 1<sup>st</sup> and 3<sup>rd</sup> quartiles (edges of box), and  
592 solid lines give 1.5x the interquartile range. Outliers are shown as black dots. Individual  
593 values are shown as coloured dots or triangles, with shape indicating the origin of the  
594 sequence as per legend. **b, Distribution of TIR lengths in bp,** as per (a). Publicly available  
595 sequences are not represented in this plot due to assembly errors in the TIR region. **c,**  
596 **Distribution of GC content,** as per (a).  
597  
598

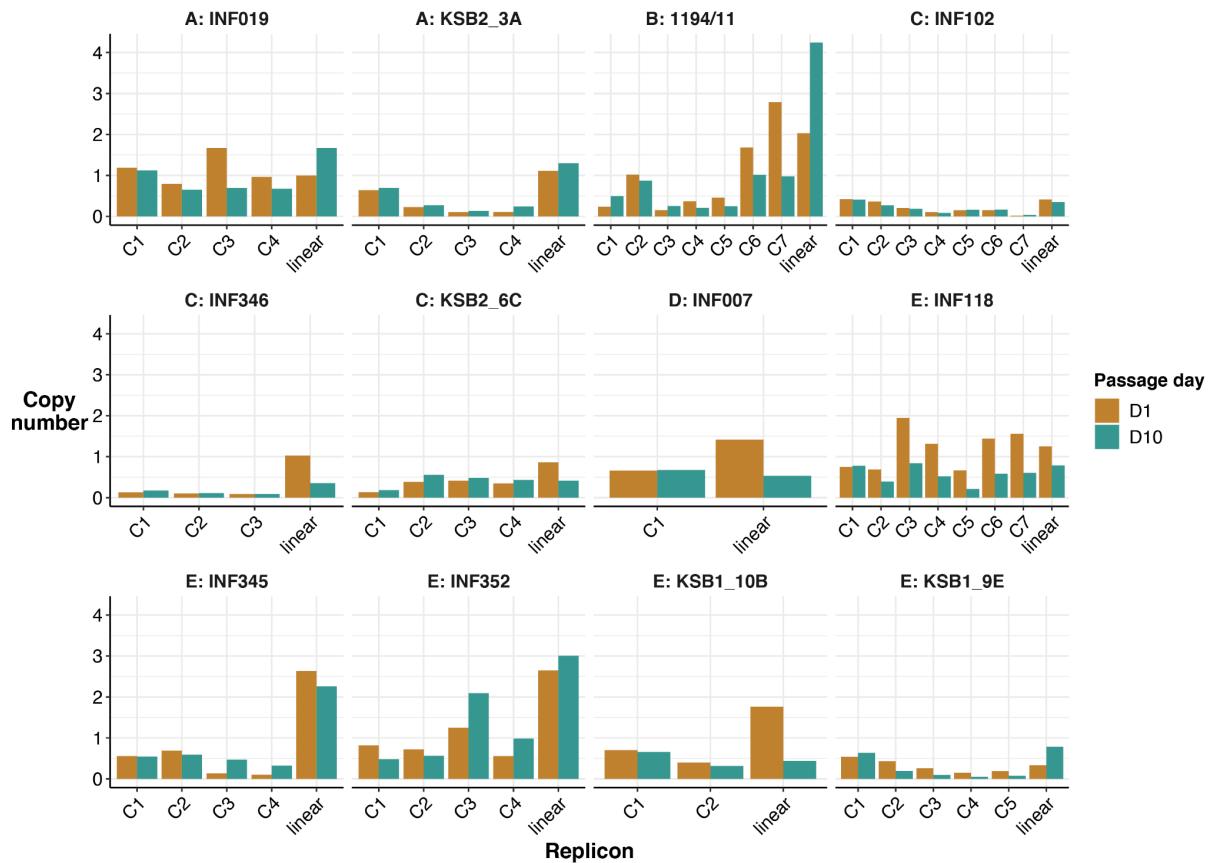

599

600 **Figure 6: Estimated copy number of all plasmid replicons in each genome.** Height of  
 601 each bar indicates copy number, coloured by passage day as per legend. Each pair of bars  
 602 represents a plasmid, C[N] indicates a circular plasmid, Linear indicates the linear plasmid in  
 603 that genome.

604

605 **Figure S1: Long read alignments to linear plasmids and one representative circular**  
 606 **plasmid per *Klebsiella* genome.** The total number of alignments shown is capped at 100 to  
 607 improve visualisation. The plasmid sequence is the thick black line at the bottom, and reads  
 608 aligning to the plasmid are shown in green if the alignment starts at the beginning or end of  
 609 the plasmid sequence, or pink if the alignment starts elsewhere. Segments coloured dotted  
 610 grey indicate regions of the read that do not align.

611

612 **Figure S2: TIR sequence alignments within each phylogroup.** Linear plasmid sequences  
 613 are clustered by gene content, with the phylogroup indicated by tip colour and coloured as  
 614 per legend. TIR sequences are aligned within each phylogroup, where each colour  
 615 represents a different nucleotide as per legend. Colour intensity indicates level of  
 616 conservation at that position (pale=low; intense=high).

617

618 **Figure S3: Cluster dendrogram of trinucleotide frequencies for the 12 linear plasmids**  
 619 **and their host *Klebsiella* chromosomes.** Trinucleotide frequencies were clustered using  
 620 *hclust*. Tips are coloured by phylogroup or chromosome (as per legend).

621

622 **Table S1: Details of all linear plasmids described in this study.**

623

624 **Table S2: Details of panaroo pangenome analysis.**

625

626 **Table S3: Presence/absence of all genes in each linear plasmids.**

627

628 **Table S4: Gene annotation details for annotations in representative plasmids,**

629 **including PFAM hits and hits to *Enterobacteriaceae*.**
