# Supplementary material for: Linear plasmids in Klebsiella and other Enterobacteriaceae
Source: bioRxiv or medRxiv preprint supplement (doi:10.1101/2021.12.14.472703), 2021-12-15
Supplement: Supplementary file [file media-1.pdf]

**circular**

**INF007**

**linear**

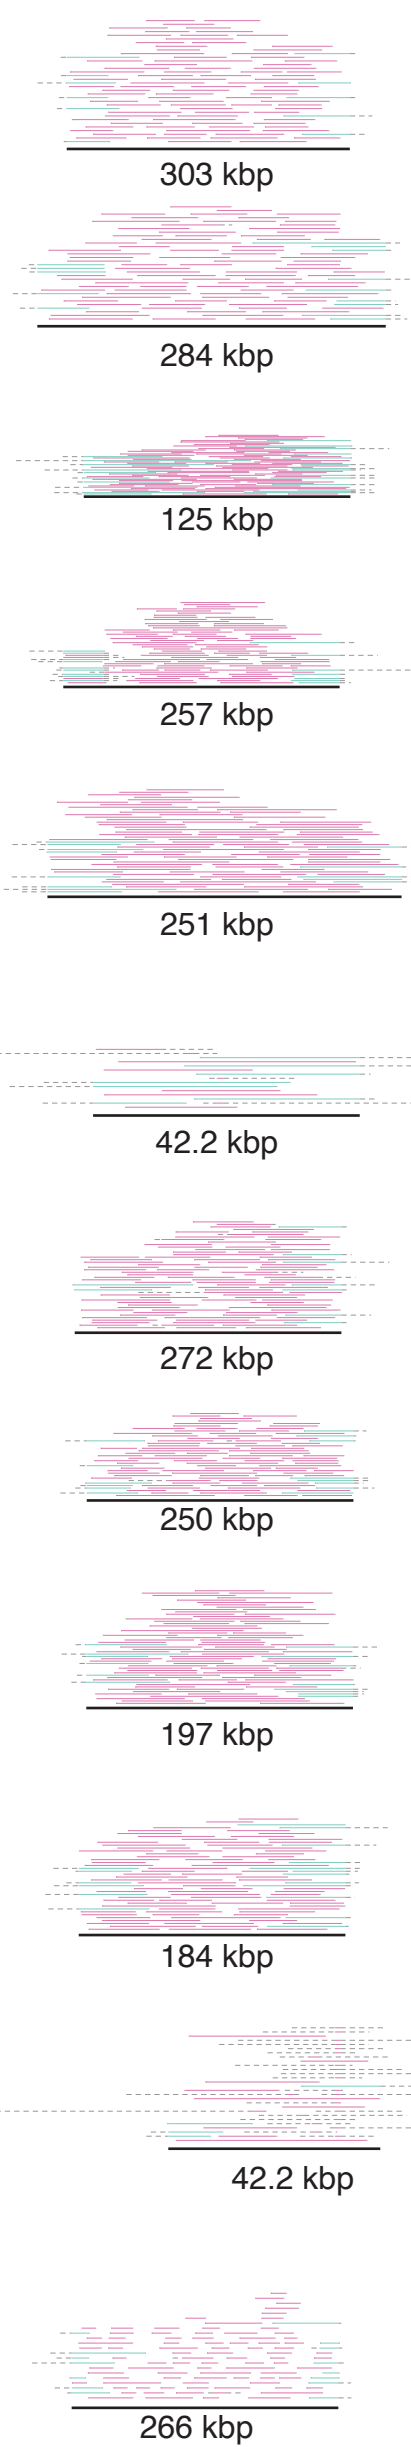

**INF019**

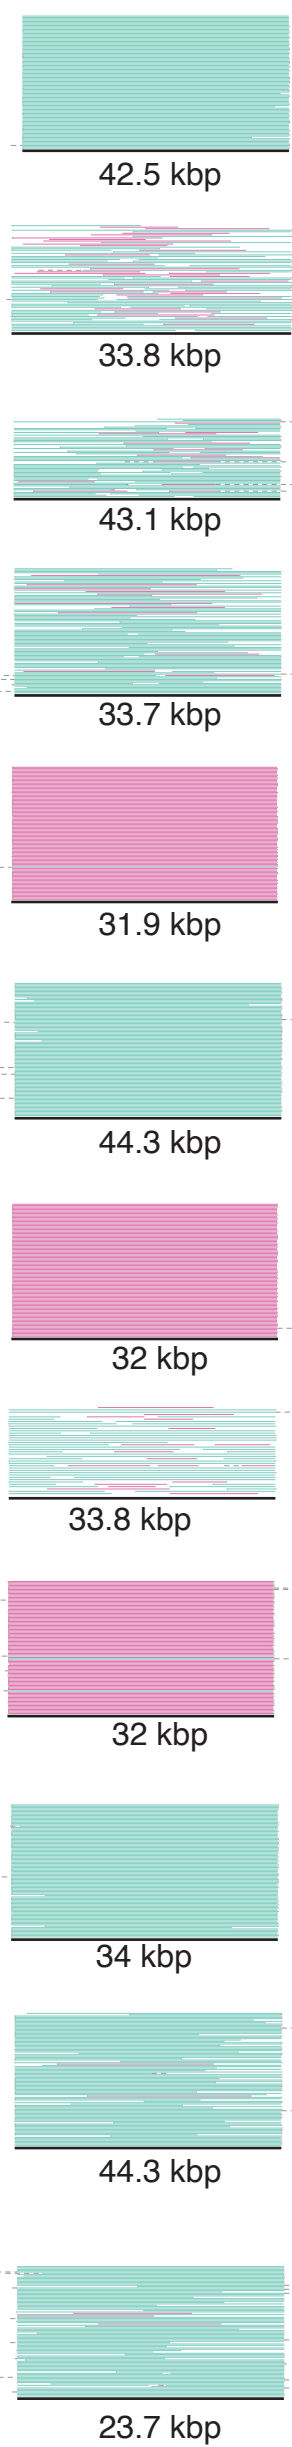

**INF102**

**INF118**

**INF345**

**INF346**

**INF352**

**KSB1\_9E**

**KSB1\_10B**

**KSB2\_3A**

**KSB2\_6C**

**1194/11**

— aligned read segment beginning at start or end of plasmid  
— aligned read segment

- - - unaligned read segment  
— plasmid sequence
