# Supplementary material for: Linear plasmids in Klebsiella and other Enterobacteriaceae
Source: bioRxiv or medRxiv preprint supplement (doi:10.1101/2021.12.14.472703), 2021-12-15

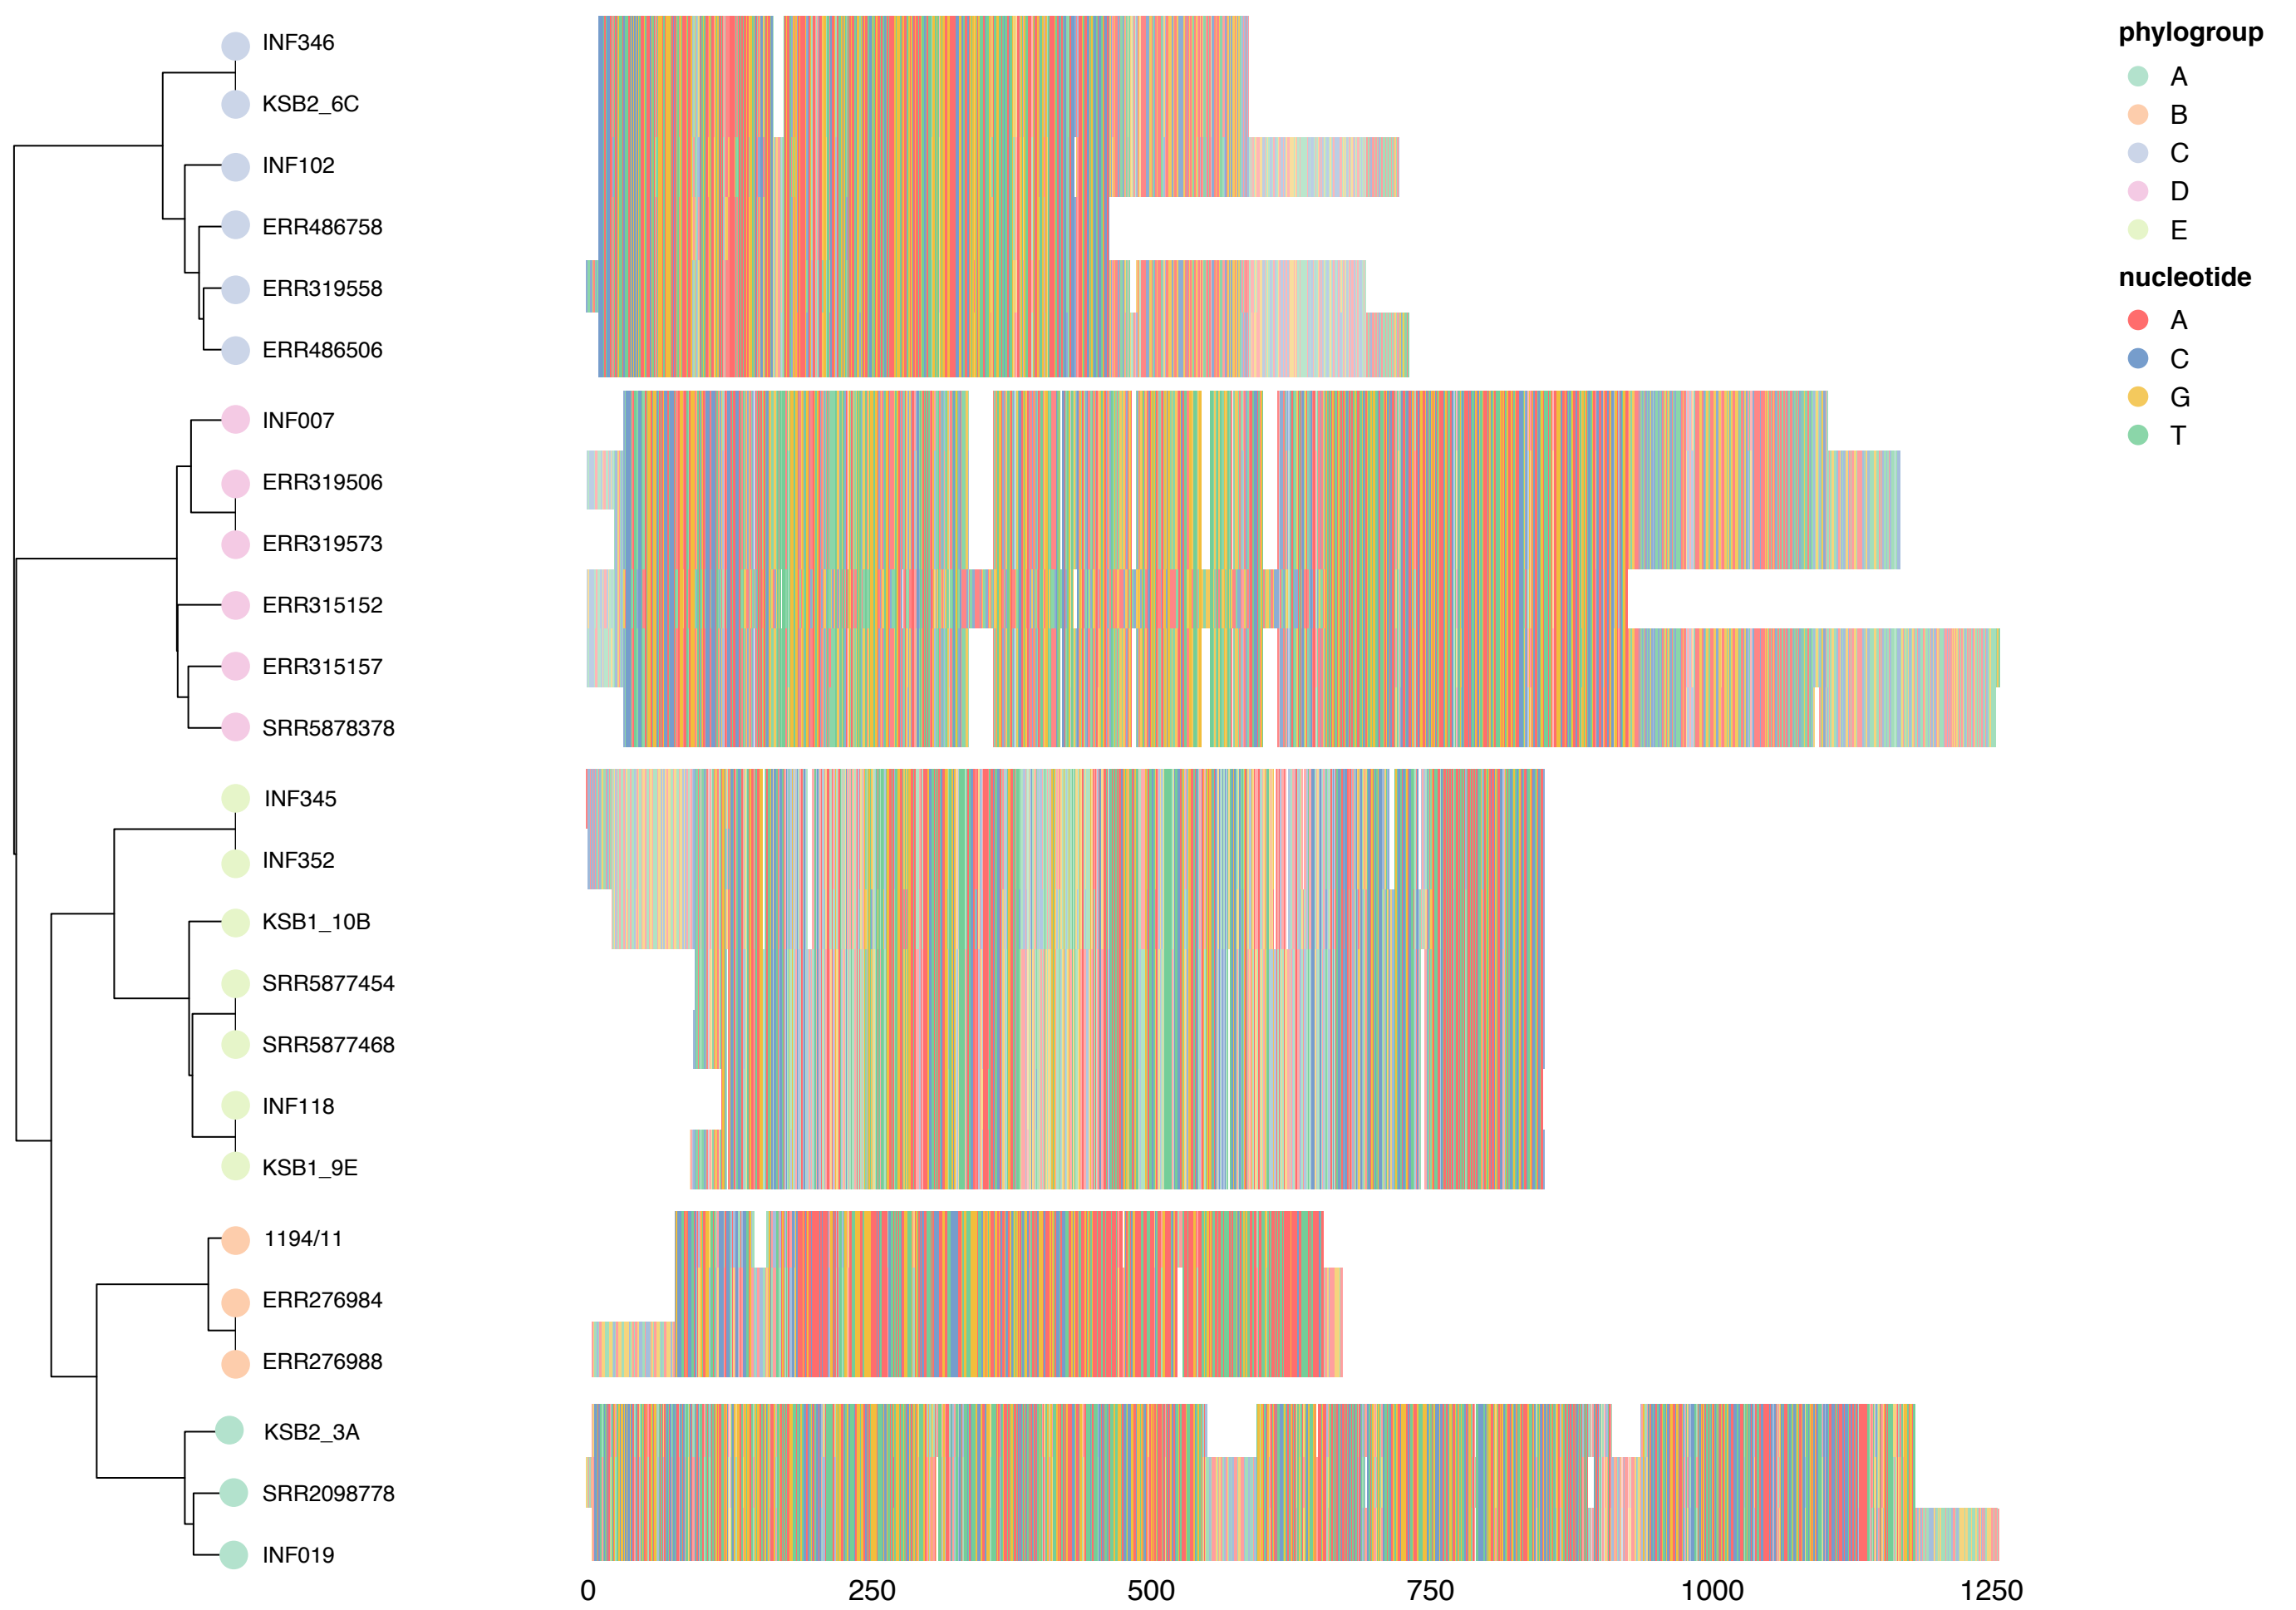

Supplement: Supplementary file [file media-2.pdf]
